# Supplementary material for: Effect of gold nanoparticle shapes for phototherapy and drug delivery
Source: Royal Society of Chemistry journal article supplement (doi:10.1039/c6py00465b), 2016-01-01
Supplement: c6py00465b1.pdf [file c6py00465b1.pdf]

## Electronic Supporting Information

### Functional Gold Nanoparticles with Different Shapes for Photothermal Therapy and Drug Delivery

Nik N. M. Adnan<sup>±ab</sup>, Y. Y. Cheng<sup>±c</sup>, Nur M. N. Ong<sup>b</sup>, Tuan T. Kamaruddin<sup>b</sup>, Eliza Rozlan<sup>b</sup>, Timothy W. Schmidt<sup>c</sup>, Hien T.T. Duong<sup>a,b,d\*</sup>, Cyrille Boyer<sup>ab</sup>

<sup>±</sup>equal contribution; <sup>\*</sup>corresponding author

<sup>a</sup>*Australian Centre for Nanomedicine, School of Chemical Engineering, University of New South Wales, Sydney, Australia 2052*

<sup>b</sup>*Centre for Advanced Macromolecular Design (CAMD), School of Chemical Engineering, University of New South Wales, Sydney, Australia 2052*

<sup>c</sup>*School of Chemistry, University of New South Wales, Sydney, Australia 2052*

<sup>d</sup>*School of Chemistry, University of Sydney, Australia 2052*

## Supplementary Figures

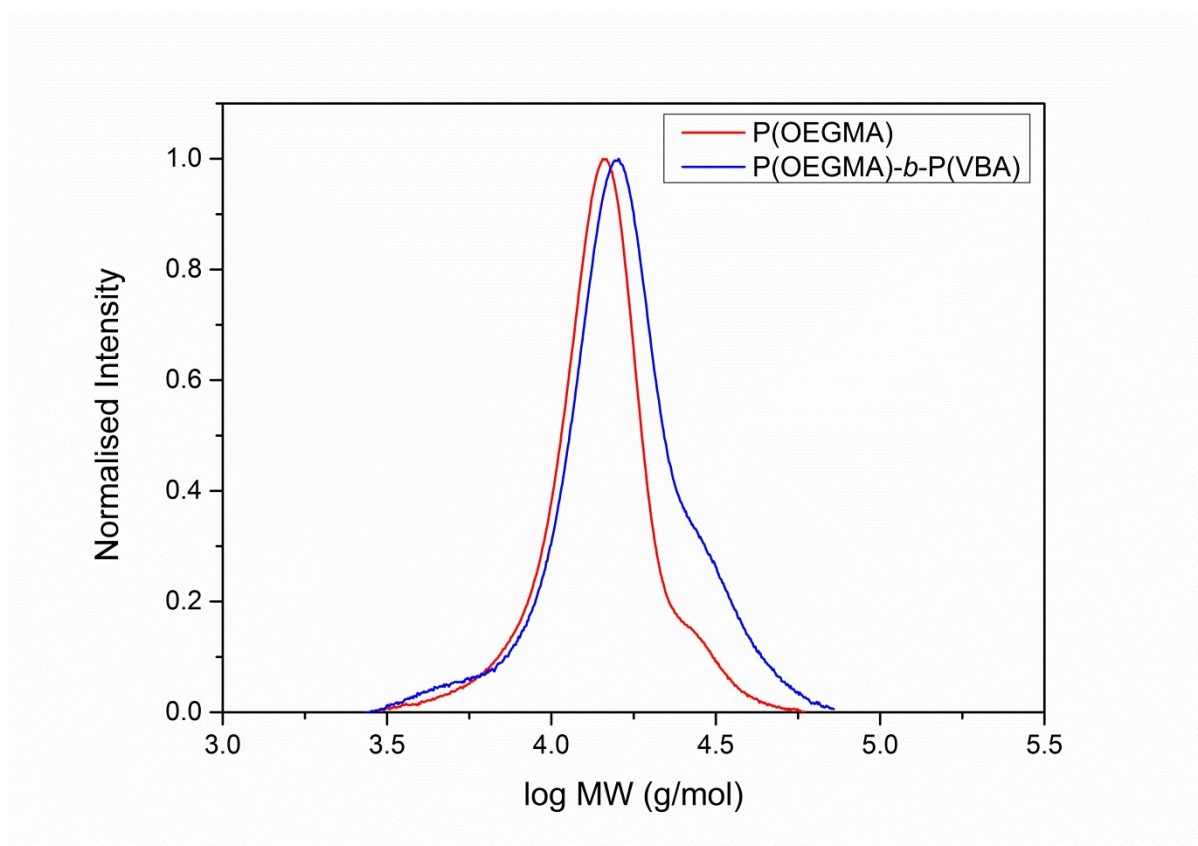

**Figure S1.** SEC traces of the polymers with DMAc as the eluent.

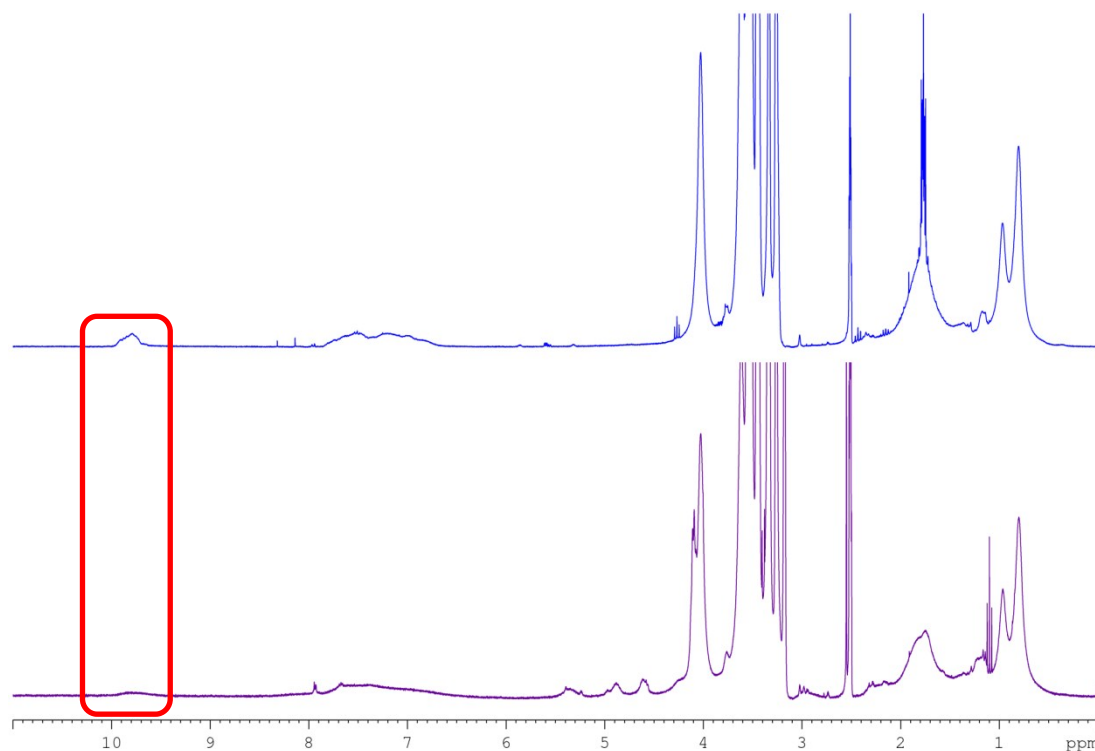

**Figure S2.** <sup>1</sup>H NMR spectra of (a) P(OEGMA)-b-P(VBA) and (b) P(OEGMA)-b-P(VBI/DOX). DOX conversion was calculated by the decreasing peak integral of aldehyde signal (10.0 ppm) from VBA.

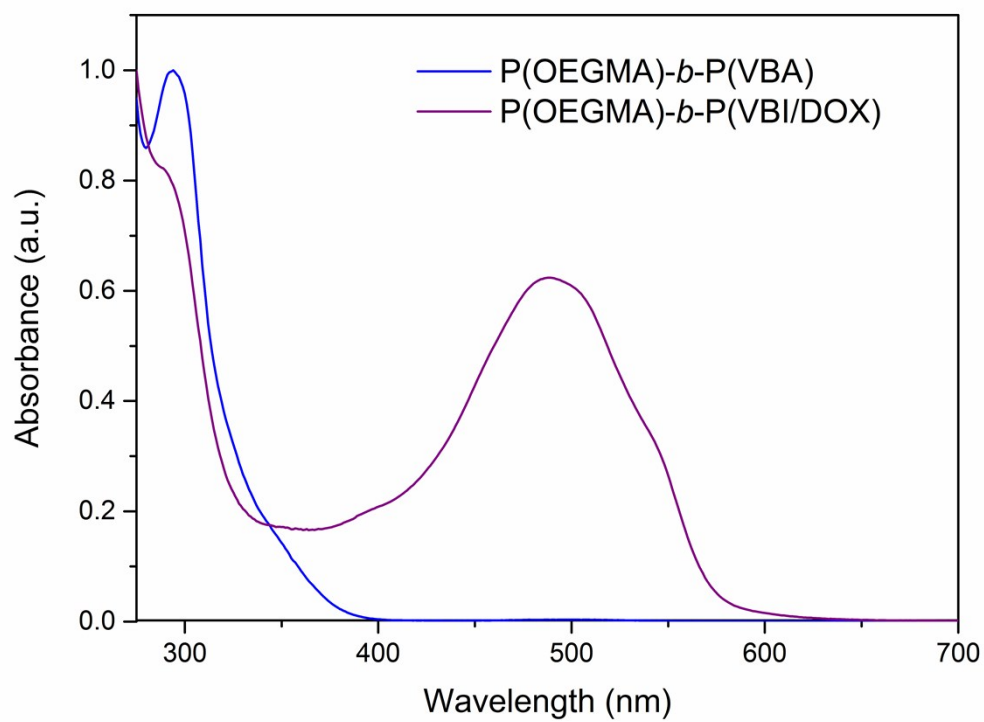

**Figure S3.** UV-Vis spectra of P(OEGMA)-*b*-P(VBA) and P(OEGMA)-*b*-P(VBI/DOX) showing the appearance of DOX absorption peak ( $\lambda_{\text{max}} = 480$  nm) and partial disappearance of RAFT chain end ( $\lambda_{\text{max}} = 300$  nm)

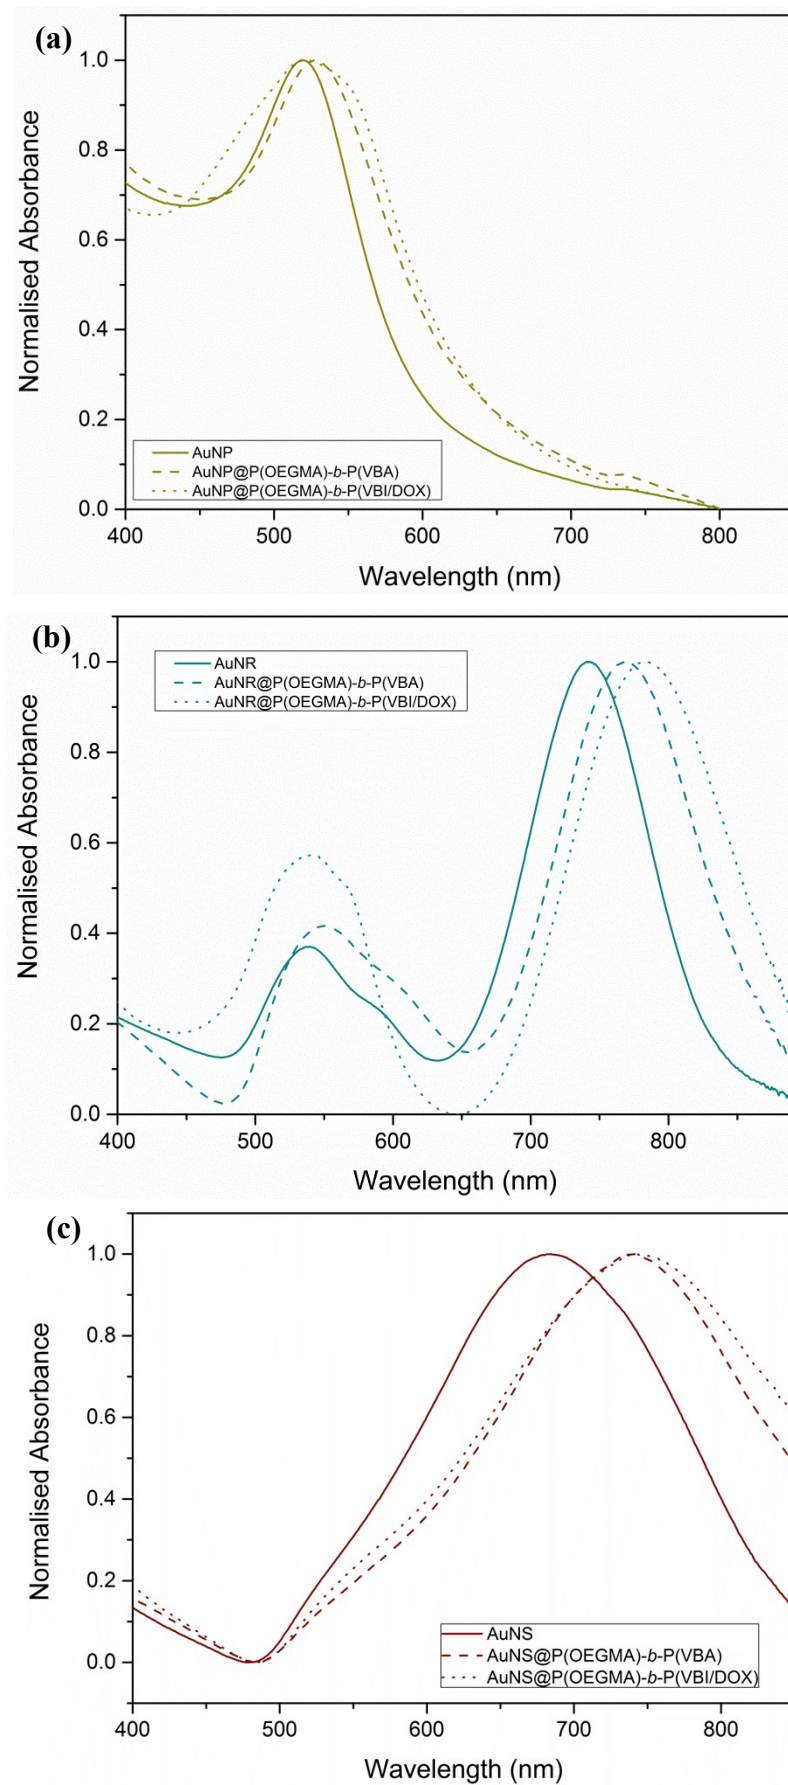

**Figure S4.** Bathochromic shift in the plasmon resonance band of gold nanoparticles confirmed by UV-Vis spectroscopy indicating successful polymer grafting to the nanoparticles. Shape of gold nanoparticles (a) sphere (b) rod (c) star.

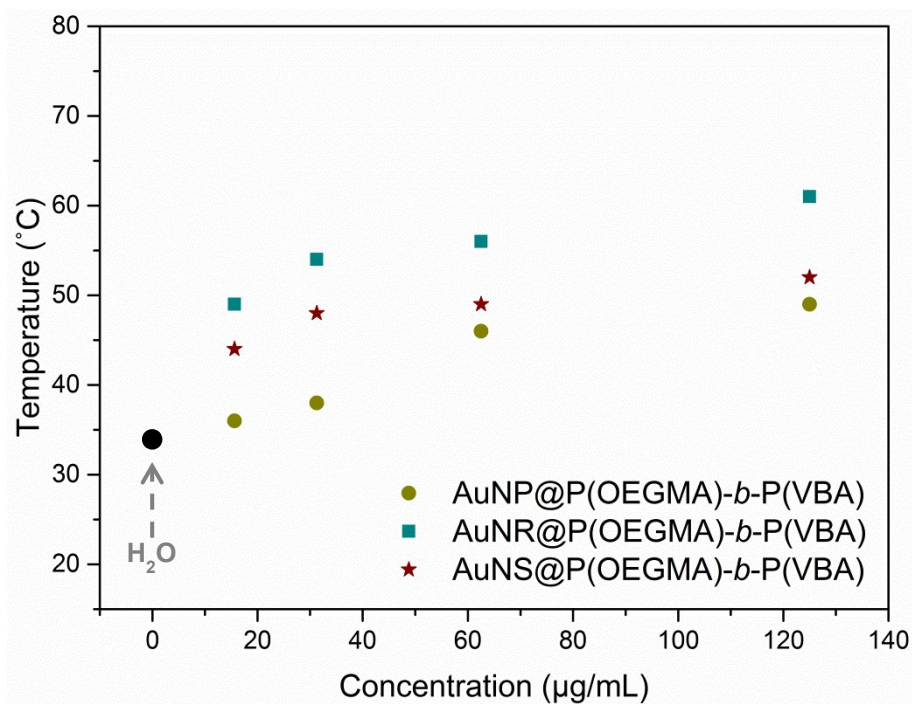

**Figure S5.** Photothermal heating of P(OEGMA)-*b*-P(VBA) functionalized gold nanoparticles with NIR light (continuous wave,  $\lambda = 725\text{-}2500\text{ nm}$ ,  $1.34\text{ W cm}^{-2}$ ) for 3 min at different gold concentrations determined by TGA. Light source was prepared by utilizing a continuous white light source (260nm~2500nm), a 725 nm long-pass filter and a 40 mm path length cuvette filled with water placed after the long-pass filter to block any irradiation which would be strongly absorbed by water.
